# Supplementary material for: De novo biosynthesis of sex pheromone components of Helicoverpa armigera through an artificial pathway in yeast
Source: Royal Society of Chemistry journal article supplement (doi:10.1039/d1gc02965g), 2021-12-21
Supplement: d1gc02965g1.pdf [file d1gc02965g1.pdf]

1 **Supplementary materials for *de novo* biosynthesis of sex pheromone**  
2 **components of *Helicoverpa armigera* through an artificial pathway in**  
3 **yeast**

4

5 This profile includes:

6 Method details

7 Table S1-4

8 Figure S1-5

9

10 **1.1 Optimization of fermentation conditions**

11 For optimization of fermentation conditions, a  $L^{16}(4^3)$  orthogonal table was designed  
12 to obtain best combination of these conditions. To be specific, pH of medium varied  
13 from 5 to 6.5 in step of 0.5 adjusted by 1M KOH, concentration of  $(NH_4)_2 SO_4$  varied  
14 from 2 g/L to 10 g/L in step of 3.7 g/L and concentration of  $KH_2PO_4$  varied from 2  
15 g/L to 15 g/L in step of 4.3 g/L. Specific combinations were shown below (Table S2  
16 & S3). Through extremum difference analysis (Fig. 4D), best theoretical combination  
17 is pH=6, 7.4 g/L  $(NH_4)_2 SO_4$ , 6.3g/L  $KH_2PO_4$ .

18

19 **1.2 Extraction of metabolites**

20 The detailed methods of free fatty acid, fatty aldehydes and alcohols from  
21 fermentation broth were shown below:

22

23 For free fatty acids, simultaneous extraction and methylation was conducted as  
24 described previously<sup>1</sup>. Briefly, cell cultures from flask fermentation were diluted  
25 twofold and those from batch were diluted 4-fold in total 0.4 mL in 4-mL glass vials.  
26 Then, 20  $\mu$ L of 40%  $(C_4H_9)_4N^+OH^-$  was added into vials followed with 400  $\mu$ L pre-  
27 mixed  $CH_2Cl_2$  solution containing 0.2M  $CH_3I$  and 50 mg/L pentadecanoic acid as an  
28 internal standard. The mixtures were shaken for 60 min at 1500 rpm on a mixer. After  
29 centrifugation, organic phases were transferred into 1.5 mL centrifugal tubes and  
30 evaporated to dryness in Concentrator Plus (Eppendorf, Germany). In the end, 50  $\mu$ L  
31 hexane was added to suspend methyl esters and transferred into glass inserts for gas  
32 chromatography (GC) or gas chromatography-mass spectrum (GC-MS) analysis.

33

34 For fatty aldehydes, cell pellets were collected by centrifuging 10 mL cell culture  
35 from flask fermentation or 2 mL from batch fermentation. After washed by 20 mL of  
36 50 mM Tris-HCl (pH 7.5), cell pellets were suspended in 0.5 mL of 6.7% Na<sub>2</sub>SO<sub>4</sub> and  
37 transferred into 4-mL glass vials. Then, 2 mL mixture of isopropanol and hexane in  
38 ratio of 2:3 (v/v) was added into vials, and the mixture was shaken for 120 min at  
39 1500 rpm on a mixer. After centrifugation, organic phases were transferred into new  
40 4-mL vials and evaporated to dryness. Finally, 50 µL hexane was added to suspend  
41 extracts and transferred into glass inserts for GC or GC-MS analysis. As for  
42 fermentation with dodecane cover, after centrifugation to promote phase separation,  
43 upper dodecane layer was directly transferred into glass inserts for analysis. Rest of  
44 cell culture were dealt with same methods mentioned above if needed.

45

46 For raw purification of fermentation extracts, cell culture from fed-batch  
47 fermentation was directly extracted by 1L hexane:isopropanol (3:2, v/v) overnight.  
48 After phase separation in funnel, near 640 mL organic phase was concentrated 40-fold  
49 for thin layer chromatography (TLC). Seventy microliter of concentrated sample was  
50 loaded onto a TLC plate (Silica gel 60, Merck, Germany) and separated with a mobile  
51 phase of hexane/diethyl ether/HAc (85:15:1, v/v/v)<sup>2</sup>. The bands were visualized by  
52 spraying 20% H<sub>2</sub>SO<sub>4</sub>-EtOH solution, followed by heating. Target gel areas were  
53 collected and suspended with 4 mL hexane. The extracts were centrifuged, and  
54 supernatant was transferred into a new vial for evaporation to dryness. One hundred  
55 microliter of hexane was added to dissolve the compounds, followed by analysis by  
56 GC-FID to quantify final concentration of (Z)-11-hexadecenal.

57

### 58 **1.3 Dimethyldisulphide (DMDS) derivatization of samples**

59 To verify the position of double bond in products, DMDS derivatization was  
60 conducted as described previously<sup>3</sup>. Briefly, near 1 µg aldehydes in *n*-hexane (20-50  
61 µL) was derivatized by addition of 50 µL of DMDS and 5 µL iodine solution (60 mg  
62 in 1 mL of ether). The reaction was conducted in 1 mL vials and kept at 40°C  
63 overnight. Then samples were diluted by 400 µL of *n*-hexane, followed with another  
64 100 µL of Na<sub>2</sub>S<sub>2</sub>O<sub>3</sub> solution ( 5% in ddH<sub>2</sub>O) to remove the iodine. The organic phase  
65 was removed and concentrated into 50 µL. A 2 µL aliquot was analyzed by GC-MS.

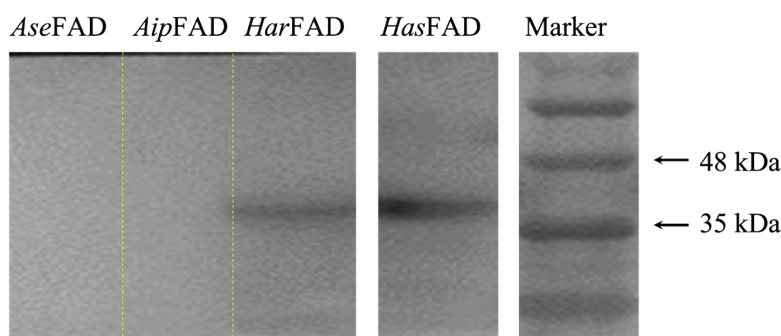

66 **Figure S1: Western-blot analysis of FADs in strain FA3**

67 After Integration with C-terminal  $6 \times$  His-tags, molecular weight of *AseFAD*, *AipFAD*,  
 68 *HarFAD* and *HasFAD* is 39.69, 39.82, 38.85 and 39.57 kDa, respectively. Expression  
 69 of *AseFAD* and *AipFAD* is below the detection limit of western-blot analysis. Under  
 70 the same total protein load, the expression of *HarFAD* is slightly lower than *HasFAD*.  
 71

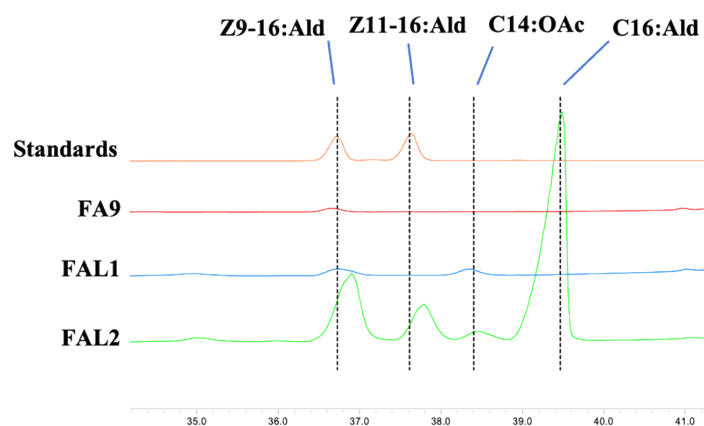

72 **Figure S2: Gas-chromatography analysis of target products in strain FA9,**  
 73 **FAL1,FAL2**

74 Gas-chromatography analysis of interested compounds in raw extracts of strain FA9,  
 75 FAL1,FAL2 after 4-day fermentation. Target products and other peaks around were  
 76 illustrated. As shown in Fig. S2, after *HFD1* deletion, strain FAL2 could produce  
 77 Z11-16:Ald.  
 78

## Standard compounds mix

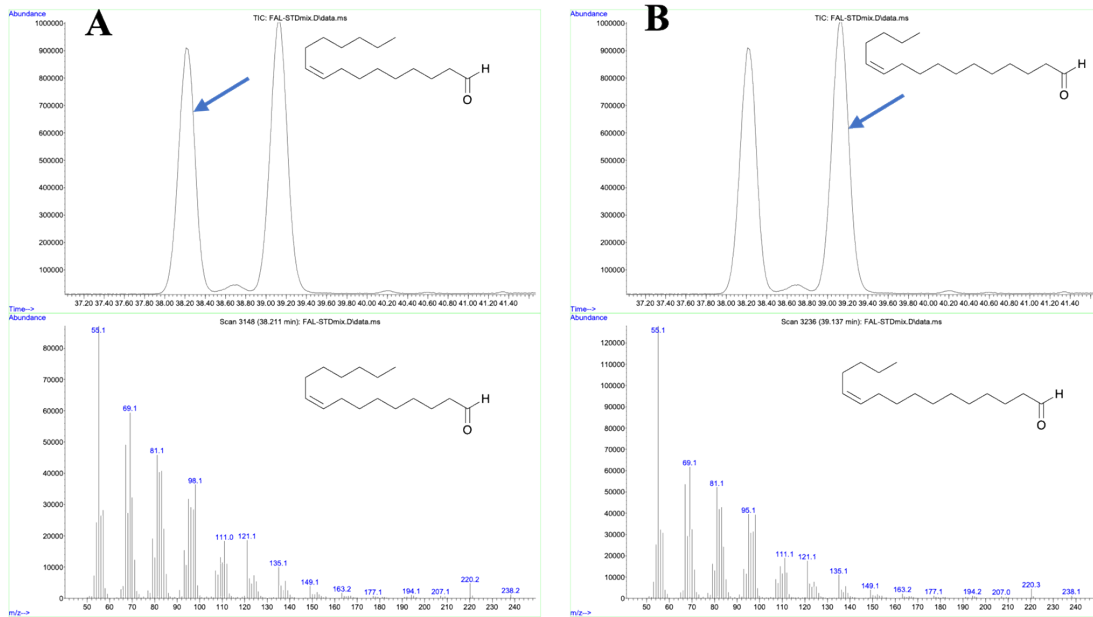

## Raw purified extracts

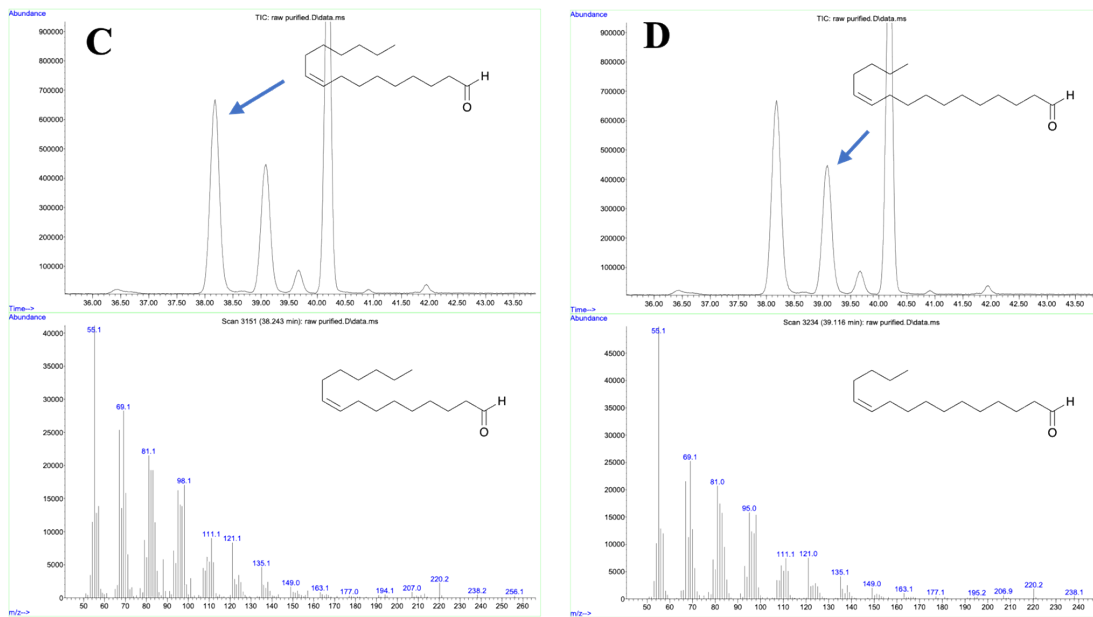

79 **Figure S3: GC-MS spectrum of aldehyde standard mixture and raw extracts of**  
80 **fermentation**

81 As shown above, retention time of candidate peaks in raw extracts of fermentation  
82 (Fig. S3C-D) corresponded to that of commercial standards in mixture (Fig. S3A-B).  
83 The fragments distribution is also similar to the corresponding, respectively.

84



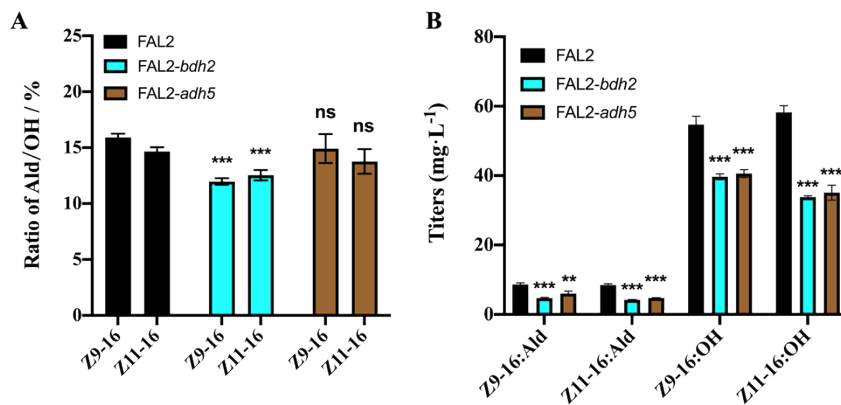

93 **Figure S5: Ratio of aldehydes to alcohols and titers of aldehydes and alcohols in**  
 94 **strain FAL2-*adh5* and -*bdh2***

95 (A) Ratio of aldehydes to alcohols in strain FAL2, FAL2-*bdh2* and FAL2-*adh5*. The  
 96 ratio was calculated by dividing titers in mmol/L of aldehydes into titers in mmol/L of  
 97 corresponding alcohols. (B) Titters of Z9-16:Ald, Z11-16:Ald, Z9-16:OH and Z11-  
 98 16:OH in strain FAL2, FAL2-*bdh2* and FAL2-*adh5*. The standard deviation was  
 99 calculated from three biological replicates. Differences in titer and ratio between  
 100 mutants and strain FAL2 are indicated: ns, not significant; \* $p < 0.05$ ; \*\* $p < 0.01$ ;  
 101 \*\*\* $p < 0.005$ .

102

103 **Table S1: Primers for strain construction**

| Primer name          | Primer sequence, 5'->3'                                      |
|----------------------|--------------------------------------------------------------|
| POX1 target RNA-fw   | GCTATTCTAGCTCTAAAAATGAAATTACAAAAGGAATCAGATCATTTATCTTTCACTG   |
| POX1 target RNA-rv   | CAGTCAAAGATAAATGATCTGATTCCTTTGTAATTTTCATGTTTTAGAGCTAGAAATAGC |
| POX1 repair oligo fw | AAAGAAAATATAATAAATTAGTATTGCGATGTAGAGGTTTCCTGTTTTCTTCGAACCC   |
| POX1 repair oligo rv | GGGTTCAAGGAAAAACAGGAAACCTCTACATCGCAATACTAATTTATTATATTTTCTTT  |
| POX1 dg fw           | GGAATTCGGTCATTAGCGGC                                         |
| POX1 dg rv           | ATCGTTGTGGCCGATGAAAC                                         |
| FAA1 target RNA-fw   | TCCTCATTCTTATAATATTCGTTTTAGAGCTAGAAATAGCAAG                  |
| FAA1 target RNA-rv   | GAATATTATAAGAATGAGGAGATCATTTATCTTTCACTGCGG                   |
| FAA1 repair oligo fw | AGACAAAAAAGACAACAATTGGATCAACATTTCCATGATAGG                   |
| FAA1 repair oligo rv | ATCATGAAAATGTTGATCCAATTGTTGTCTTTTTTTGTCTTTTGTG               |
| FAA1 dg fw           | CTTAGAATATGGATGATGCAGCCC                                     |
| FAA1 dg rv           | GGTTGCTATGGTTTGTCTTCC                                        |

|                       |                                                              |
|-----------------------|--------------------------------------------------------------|
| FAA4 target RNA-fw    | AATAAACCTTAAGTTTCCACGTTTTAGAGCTAGAAATAGCAAG                  |
| FAA4 target RNA-rv    | GTGGAAACTTAAGGTTTATTGATCATTATCTTTCACTGCGG                    |
| FAA4 repair oligo fw  | ACTAAGAAGTACGCATCAAAAGGAAGACATAGTTTTTTACTTTCC                |
| FAA4 repair oligo rv  | GTAAAAAACTATGTCTTCCTTTTGATGCGTACTTCTTAGTTTTTC                |
| FAA4 dg fw            | CGGCTTTTTGGCTGCGCGTC                                         |
| FAA4 dg rv            | CAAACCTGGTGTACTATAGTGC                                       |
| GAL80 target RNA-fw   | GCAGTGAAAGATAAATGATCGTTTATAAAAGTAACATGATGTTTTAGAGCTAGAAATAG  |
| GAL80 targetRNA-rv    | GCTATTCTAGCTCTAAAAACATCATGTTACTTTTATAAACGATCATTATCTTTCACTG   |
| GAL80 repair oligo fw | GGTTTCCCGTTCTTTCCACTCCCGTCAAGCATCTTGCCCTGTGCTTGGCCC          |
| GAL80 repair oligo rv | GGGGCCAAGCACAGGGCAAGATGCTTGACGGAGTGGAAAGAACGGGAAACC          |
| GAL80 dg fw           | CCTGCTGGTCTTCTGGTCTG                                         |
| GAL80 dg rv           | TATGATGGAAGGATGCCCGC                                         |
| HFD1 targetRNA fw     | GCAGTGAAAGATAAATGATCAGGGTAAAAATCATTCCAATAGTTTTAGAGCTAGAAATAG |
| HFD1 targetRNA rv     | CTATTCTAGCTCTAAAACTATTGGAATGATTTTACCCTGATCATTATCTTTCACTGC    |
| HFD1 repair oligo fw  | ATAGCCATAGTAATTTATACCAACACGTAATGTTTAAAGGTTAATTAATTATTTGATG   |
| HFD1 repair oligo rv  | AATTAATTAACCTTAAACATTACGTGTTGGTGATAAATTAATTAATTTGATG         |
| HFD1 dg fw            | TTCCAGTACAGGCACACCAG                                         |
| HFD1 dg rv            | GGGTGATGGTTTGGCGAATG                                         |
| ADH5 targetRNA fw     | CAATTGAAATTTCCATTAATGTTTTAGAGCTAGAAATAGCAAG                  |
| ADH5 targetRNA rv     | ATTAATGGAAATTTCAATTGGATCATTATCTTTCACTGCGG                    |
| ADH5 repair oligo fw  | ATCTACAAAATCAAAGCATCTCTTTTGTAACGAATTTGATGAATATA              |
| ADH5 repair oligo rv  | ATCAAATTCGTTACAAAAGAGATGCTTTGATTTTGTAGATATGTAG               |
| ADH5 dg fw            | AGTTCTCCTTTCCGCGGAAGG                                        |
| ADH5 dg rv            | TGGCTAGCTTTGGGACGATC                                         |
| BDH2 targetRNA fw     | AGTGTGAAAACTTGAAAGTGTTTAGAGCTAGAAATAGCAAG                    |
| BDH2 targetRNA rv     | ACTTCAAGTTTTTCACACTGATCATTATCTTTCACTGCGG                     |
| BDH2 repair oligo fw  | TTCATTGAACATATTTAGATTGTGATTGAGTACTCACGTTT                    |
| BDH2 repair oligo rv  | ACGTGAGTACTCAATCACAATCTGAAATATGTTCAATGAATTTATTGTTA           |
| BDH2 dg fw            | GATATGATAAGGAGAACTAAGCA                                      |
| BDH2 dg rv            | GTCACACGAAGTATCTGCC                                          |
| XI-3 target RNA-fw    | GCAGTGAAAGATAAATGATCATATGTCTCTAATTTTGGAAAGTTTTAGAGCTAGAAATAG |
| XI-3 target RNA-rv    | CTATTCTAGCTCTAAAACTTCCAAAATTAGAGACATATGATCATTATCTTTCACTGC    |
| XI-3 up-repair fw     | AGTTACTTGCTCTATGCGTTTGC                                      |

|                         |                                                             |
|-------------------------|-------------------------------------------------------------|
| XI-3 up-repair rv       | CCGCTCGGCGGCTTCTAATCCGTACTAATCAGACGCACGCTTGGC               |
| XI-3 dn-repair fw       | GAGAAGGTTTTGGGACGCTCGAAGTTACGTGGATTGAGCCAGCA                |
| XI-3 dn-repair rv       | TGAGAATCCGGACCAGCAGAT                                       |
| XI-3-up-Gal1p fw        | ATTGACGCCAAGCGTGCCTGATTAGTACGGATTAGAAGCCGCC                 |
| GAL1p rv                | GGGTTTTTCTCCTTGACG                                          |
| CYC1t fw                | ATCCGCTCTAACCGAAAAGG                                        |
| XI-3-dn-CYC1t rv        | ATCTGTATTGCTGGCTCAATCCACGTAACCTCGAGCGTCCAAAAACCT            |
| Delta target RNA-fw     | TGATCTGAGGATTCCTATATCCTCGGTTTTAGAGCTAGAAAATAGCAAG           |
| Delta target RNA-rv     | TCTAAAACCGAGGATATAGGAATCCTCAGATCATTATCTTTCCTGCGGAGAAG       |
| Delta up-repair fw      | TGTTGGAATAGAAATCAACTAT                                      |
| Delta up-repair rv      | GGATATAGGAATCCTCAAAATG                                      |
| G418-Delta dn-repair fw | TGTCAAGGAGGGTATTCTGGGCCTCCATGTCGCTGTCGAGGAGAACTTCTAGTATATTC |
| Delta dn-repair rv      | ATGAAGCAGGTGTTGTTGTCTGTTGAG                                 |
| G418p-fw                | CAGCGACATGGAGGCCAGAAT                                       |
| G418t-rv                | TCGACACTGGATGGCGGCGTTA                                      |
| Delta-GAL1p-fw          | GATTCCATTTGAGGATTCCTATATCCAGTACGGATTAGAAGCCGCCGAGC          |
| G418t-CYC1t-rv          | CTAACGCCGCCATCCAGTGTGCGACTTCGAGCGTCCAAAAACCTTCTCAAG         |
| AipFAD-fw               | ATGGCTCAAGGCGTCCAAACG                                       |
| AipFAD-rv               | TTAATTGTCTTTCCAGATTTTCAAAAT                                 |
| GAL1p-AipFAD fw         | CTCTATACTTTAACGTCAAGGAGAAAAAACCCATGGCTCAAGGCGTCCAAACGACTACG |
| CYC1t-AipFAD rv         | TGTCTAACTCCTTCCTTTTCGGTTAGAGCGGATTTAATTGTCTTTCCAGATTTTCAA   |
| CYC1t-AipFAD-His rv     | GTCTAACTCCTTCCTTTTCGGTTAGAGCGGATTTAGTGATGGTGATGATGGTGATTGTC |
| HasFAD-fw               | ATGGCCCAAAGCTATCAATCAAC                                     |
| HasFAD-rv               | TTAACTTAATTTATCGTTTACACCCGATCC                              |
| GAL1p-HasFAD fw         | TATACTTTAACGTCAAGGAGAAAAAACCCATGGCCCAAAGCTATCAATCAACTACGG   |
| CYC1t-HasFAD rv         | TGTCTAACTCCTTCCTTTTCGGTTAGAGCGGATTTAACTTAATTTATCGTTTACACC   |
| CYC1t-HasFAD-His rv     | AACTCCTTCCTTTTCGGTTAGAGCGGATTTAGTGATGGTGATGATGGTGACTTAATTTA |
| HarFAD-fw               | ATGGCCCAAAGCTATCAATC                                        |
| HarFAD-rv               | TTAACTTGATTTATCTTTTACATCCC                                  |
| GAL1p-HarFAD fw         | ACCTCTATACTTTAACGTCAAGGAGAAAAAACCCATGGCCCAAAGCTATCAATCAA    |
| CYC1t-HarFAD- rv        | TTGTCTAACTCCTTCCTTTTCGGTTAGAGCGGATTTAACTTGATTTATCTTTTACATC  |
| CYC1t-HarFAD-His- rv    | TCCTTTTCGGTTAGAGCGGATTTAGTGATGGTGATGATGGTGACTTGATTTATCTTTTA |
| AseFAD-fw               | ATGGCTCAAGGTGTTCAAACACTAC                                   |



|                      |                                                              |
|----------------------|--------------------------------------------------------------|
| AseFAD-rv            | TTAATTATCTTTCCAGATCT                                         |
| GAL1p-AseFAD fw      | TATACTTTAACGTCAAGGAGAAAAAACCCATGGCTCAAGGTGTTCAAACACTACAACAT  |
| CYC1t-AseFAD rv      | GTCTAACTCCTTCCTTTTCGGTTAGAGCGGATTTAATTATCTTTCCAGATCTTCAA     |
| CYC1t-AseFAD-His rv  | TAACTCCTTCCTTTTCGGTTAGAGCGGATTTAGTGATGGTGATGATGGTGATTATCTTT  |
| OLE1p target RNA-fw  | TAAATGATCATAGCCGTAACAATAGGGATGTTTTAGAGCTAGAAAATAGCAAGTTAAAAT |
| OLE1p target RNA-rv  | AGCTCTAAAACATCCCTATTGTTACGGCTATGATCATTTATCTTTCAGTCCGGAGAAGT  |
| OLE1p-up fw          | GTTCTGAGGTATTTCGTATCGC                                       |
| OLE1p-up rv          | TCTATGGTAACCGGCAGTAAT                                        |
| CTR3p-fw             | GTATTCCAATGAGAATCGCTAG                                       |
| CTR3p-rv             | CTTTGTATAGCCCTTAAATGTG                                       |
| CTR3p-OLE1pOUT-UP-rv | CATTTCTAGCGATTCTCATTGGAATACATAGTCACGGAGAATCTTGACG            |
| CTR3p-OLE1-fw        | GAAAACACATTTAAGGGCTATACAAAAGATGCCAACTTCTGGAACACTA            |
| MET3p-fw             | TGGTATAAGGTGAGGGGGTCCACAG                                    |
| MET3p-rv             | GAATACCACCGTGAGGAGCAGGCATG                                   |
| MET3p-OLE1pOUT-UP-rv | CTGTGGACCCCTCACCTTATACCAATAGTCACGGAGAATCTTGACGT              |
| MET3p-OLE1-fw        | CATGCCTGCTCCTCACGGTGGTATTCATGCCAACTTCTGGAACACTA              |
| CYC1p-fw             | TCATTGGCGAGCGTTGGTT                                          |
| CYC1p-rv             | ATTTAGTGTGTATTGTGTTTG                                        |
| CYC1p-OLE1pOUT-up-rv | ACCAACCAACGCTCGCCAAATGAATAGTCACGGAGAATCTTGACGT               |
| CYC1p-OLE1-fw        | ACACAAACACAAATACACACACTAAATATGCCAACTTCTGGAACACTA             |
| PDA1p-fw             | GAAATTCAAACTCTCCAGACAA                                       |
| PDA1p-rv             | ATTGGCACAAATGTGGTTTCTT                                       |
| PDA1p-OLE1pOUT-UP-rv | CTTTGTCTGGAGAGTTTTGAATTTTCATAGTCACGGAGAATCTTGACGT            |
| PDA1p-OLE1-fw        | GAAAGGAAACCACATTTGTGCCAATATGCCAACTTCTGGAACACTA               |
| YMRW15 target RNA-fw | GATGGCATAATATTGAGAAAGTTTTAGAGCTAGAAAATAGCAAG                 |
| YMRW15 target RNA-rv | TTTCTCAATATTATGCCATCGATCATTTATCTTTCAGTCCGGAGAAG              |
| YMRW15-up-fw         | TCAATCAAAGCAACCCACAA                                         |
| YMRW15-up-rv         | AGTAAAAAAGGAGTAGAAACATTTTGAAGCTATGGCGCGTGCGGTGTAAGAAAATGACA  |
| TCDP-fw              | CTGTTTCTCAAACCTTATGTCAATTTTCTTACACCGCACGCGCCATAGCTTCAAAATGTT |
| TCDP-rv              | TTCTTTCCAATCTTTCTTCTCTGGTAATTGGGGACATTTTGTGTTTATGTGTGTTA     |
| MmaCAR-fw            | GAACTTAGTTTCGAATAAACACACATAAACAAACAAAATGTCCCAATTACCAGAGAAG   |
| MmaCAR-rv            | TACTTGACCTGAACTTAACGATTTGCTCTCAATCCGCTTACAACAAGCCCAACAGCCTC  |
| RBLt-fw              | GTACGTTTCTGATTTGAGGCTGTTGGGCTTGTGTGAAGCGGATTGAGAGCAAATCGTTA  |

|              |                                                             |
|--------------|-------------------------------------------------------------|
| RBLt-rv      | GCGTATTTAAGTTAATAACTCGAAAATTCTGCGTTAGCCGAAAATCTTCAAGCACG    |
| PGK1t-fw     | AATGAATCTTTCTGTCGTGCTTGAAAGATTTTCGGCTAACGCAGAATTTTCGAGTTATT |
| PGK1t-rv     | ACCATGTGCTACTGGTGTATGTAAGTCTGTCTTGAGATCTCCCATGTCTCTACTGGT   |
| npgA-fw      | CAAAGAAGCACCACCACCAGTAGAGACATGGGAGATCTCAAGACAAGCAGTTACATACA |
| npgA-rv      | GAAAGCATAGCAATCTAATCTAAGTTTTAATTACAAAATGGTTCAAGATACCTCTTCTG |
| TEF1p-fw     | TTGGAGAGGTAGAAGCAGAAGAGGTATCTTGAACCATTTTGAATTAATACTTAGATTA  |
| TEF1p-rv     | GAAGATTTATAATGGTTTATCGGTTGCATTTCCATGAGTGATCCCCACACACCATAG   |
| YMRW15-dn-fw | GTAGAAACATTTTGAAGCTATGGTGTGTGGGGGATCACTCATGAAAATGCAACCGATA  |
| YMRW15-dn-rv | GCCGTCCTCATGATGTGTTA                                        |

104

105 **Table S2: Levels set in pH and concentration of phosphate and nitrogen source**

| Levels | pH  | (NH <sub>4</sub> ) <sub>2</sub> SO <sub>4</sub> g/L | KH <sub>2</sub> PO <sub>4</sub> g/L |
|--------|-----|-----------------------------------------------------|-------------------------------------|
| 1      | 5   | 2                                                   | 2                                   |
| 2      | 5.5 | 4.7                                                 | 6.3                                 |
| 3      | 6   | 7.4                                                 | 10.6                                |
| 4      | 6.5 | 10                                                  | 15                                  |

106

107 **Table S3: Combinations in optimization of fermentation conditions**

| Number | Combinations | pH  | (NH <sub>4</sub> ) <sub>2</sub> SO <sub>4</sub> g/L | KH <sub>2</sub> PO <sub>4</sub> g/L |
|--------|--------------|-----|-----------------------------------------------------|-------------------------------------|
| 1      | 111          | 5   | 2                                                   | 2                                   |
| 2      | 122          | 5   | 4.7                                                 | 6.3                                 |
| 3      | 133          | 5   | 7.4                                                 | 10.6                                |
| 4      | 144          | 5   | 10                                                  | 15                                  |
| 5      | 212          | 5.5 | 2                                                   | 6.3                                 |
| 6      | 223          | 5.5 | 4.7                                                 | 10.6                                |
| 7      | 234          | 5.5 | 7.4                                                 | 15                                  |
| 8      | 241          | 5.5 | 10                                                  | 2                                   |
| 9      | 313          | 6   | 2                                                   | 10.6                                |
| 10     | 324          | 6   | 4.7                                                 | 15                                  |
| 11     | 331          | 6   | 7.4                                                 | 2                                   |
| 12     | 342          | 6   | 10                                                  | 6.3                                 |

|    |     |     |     |      |
|----|-----|-----|-----|------|
| 13 | 414 | 6.5 | 2   | 15   |
| 14 | 421 | 6.5 | 4.7 | 2    |
| 15 | 432 | 6.5 | 7.4 | 6.3  |
| 16 | 443 | 6.5 | 10  | 10.6 |

108

109 **Table S4: Concentration of Z9-16: Ald and Z11-16: Ald in tested samples in**

110 **dual-choice assay**

| Samples              | Z9-16: Ald (mg/L) | Z11-16: Ald (mg/L) |
|----------------------|-------------------|--------------------|
| Standard blend       | 1.5               | 48.5               |
| Raw extracts of FAL2 | 91.9              | 45.3               |
| Raw extracts of WT   | 0                 | 0                  |
| Raw purified of FAL2 | 75.2              | 47.5               |

111

## 112 **References**

- 113 1 Y. J. Zhou, N. A. Buijs, Z. Zhu, J. Qin, V. Siewers and J. Nielsen, *Nat.*  
114 *Commun.*, 2016, **7**, 11709.
- 115 2 B. J. Ding, P. Hofvander, H. L. Wang, T. P. Durrett, S. Stymne and C. Löfstedt,  
116 *Nat. Commun.*, 2014, **5**, 1–7.
- 117 3 H. R. Buser, H. Arn, P. Guerin and S. Rauscher, *Anal. Chem.*, 1983, **55**, 818–  
118 822.
- 119
